# Supplementary material
Source: HighWire-hosted journal article supplement (https://bmjopen.bmj.com/content/9/8/e025620)
Supplement: inline-supplementary-material-1 [file inline-supplementary-material-1.pdf]

**Supplementary Files**

**Table S1. Study Characteristics of Randomised Control Trials Included in the IPD Meta-Analysis (n = 21)**

| Author (Year)                  | Period                       | Original inclusion/exclusion criteria                                                                                                                                                                                                                                                                                                                                                                                                                 | Country     | Method to measure gestational weight gain (GWG)                                                 | Intervention | Intervention Detail                                                                                                                                                                                                                      | Outcome                                                                                                                | Original i-WIP N (%) in this analysis |
|--------------------------------|------------------------------|-------------------------------------------------------------------------------------------------------------------------------------------------------------------------------------------------------------------------------------------------------------------------------------------------------------------------------------------------------------------------------------------------------------------------------------------------------|-------------|-------------------------------------------------------------------------------------------------|--------------|------------------------------------------------------------------------------------------------------------------------------------------------------------------------------------------------------------------------------------------|------------------------------------------------------------------------------------------------------------------------|---------------------------------------|
| Althuisen <i>et al.</i> (2013) | February 2005 to May 2006    | Inclusion criteria: primigravida, ability to read and speak Dutch, ≤14 weeks' gestation.                                                                                                                                                                                                                                                                                                                                                              | Netherlands | Pre-pregnancy: self-reported.<br>Early pregnancy: measured at 15 weeks' gestation               | Mixed        | Counselling sessions (The New Life[style] Study) five times during pregnancy (15 minutes each) on weight, physical activity and diet.                                                                                                    | Excessive weight gain, BMI, postpartum weight retention, birth weight, macrosomia, preterm birth, gestational diabetes | 258<br>187 (72.5%)                    |
| Baciuk <i>et al.</i> (2008)    | Not described                | Inclusion criteria: <20 weeks' gestation, singleton pregnancy, receiving prenatal care at the institution and intended to give birth there. Exclusion criteria: engaging in regular physical activity, ≥2 caesarean sections, neurological, cardio-vascular, pulmonary, muscular-skeletal or endocrine disorders, morbid obesity, severe anaemia or vaginal bleeding during pregnancy.                                                                | Brazil      | Pre-pregnancy: self-reported.<br>Early pregnancy: (estimated from pre-pregnancy as per methods) | Exercise     | Water aerobics three times per week (50 minutes each) in an indoor swimming pool.                                                                                                                                                        | Maternal cardiovascular capacity, heart rate, blood pressure, experience at delivery and fetal heart rate              | 71<br>68 (95.8%)                      |
| Bogaerts <i>et al.</i> (2013)  | March 2008 and April 2011    | Inclusion: BMI ≥29 kg/m <sup>2</sup> . Exclusion criteria: >15 weeks' gestation, pre-existing type 1 diabetes, multiple pregnancy, primary need for nutritional advice and insufficient knowledge of the Dutch language                                                                                                                                                                                                                               | Belgium     | Pre-pregnancy self-reported.<br>Early pregnancy: (estimated from pre-pregnancy as per methods)  | Mixed        | Two arms. (1) Brochure group: brochure with advice on diet, physical activity and limiting excessive GWG, (2) Prenatal session group: brochure plus four prenatal motivational lifestyle intervention sessions led by a trained midwife. | GWG, Anxiety, feelings of depression                                                                                   | 197<br>196 (99.5%)                    |
| Haakstad <i>et al.</i> (2011)  | September 2007 to March 2008 | Inclusion criteria: Nulliparous, low pre-pregnancy exercise, sufficient understanding of Norwegian, and ≤24 weeks' gestation. Exclusion criteria: history of miscarriages, severe heart disease, persistent bleeding after 12 weeks' gestation, multiple pregnancy, poorly controlled thyroid disease, pregnancy-induced hypertension or pre-eclampsia, diabetes or gestational diabetes, and other diseases that could interfere with participation. | Norway      | Pre-pregnancy self-reported.<br>Early pregnancy: measured at 12-24 weeks' gestation             | Exercise     | Aerobic dance/strength training class 2-3 times per week (one hour each) for a minimum of 12 weeks. Advised 30 minutes of moderate self-imposed physical activity on the remaining week-days (recorded in a personal training diary).    | Infant birth weight, gestational age at delivery, Apgar score.                                                         | 105<br>83 (79.0%)                     |

Table S1. cont.

| Author (Year)                 | Period                     | Original inclusion/exclusion criteria                                                                                                                                                                                                                                                                                                                                                                                                                                               | Country   | Method to measure GWG                                                                | Intervention | Intervention Detail                                                                                                                                                                                                                                                                                                                                                                                                                                                                             | Outcome                                                                                                                                                                                                             | Original N (%) in this analysis | i-WIP N (%) in this analysis |
|-------------------------------|----------------------------|-------------------------------------------------------------------------------------------------------------------------------------------------------------------------------------------------------------------------------------------------------------------------------------------------------------------------------------------------------------------------------------------------------------------------------------------------------------------------------------|-----------|--------------------------------------------------------------------------------------|--------------|-------------------------------------------------------------------------------------------------------------------------------------------------------------------------------------------------------------------------------------------------------------------------------------------------------------------------------------------------------------------------------------------------------------------------------------------------------------------------------------------------|---------------------------------------------------------------------------------------------------------------------------------------------------------------------------------------------------------------------|---------------------------------|------------------------------|
| Harrison <i>et al.</i> (2013) | Not described              | Inclusion criteria: 12-15 weeks' gestation, BMI $\geq 25$ or $\geq 23$ kg/m <sup>2</sup> if high-risk ethnicity (Polynesian, Asian, and African populations) or $\geq 30$ kg/m <sup>2</sup> , increased risk of GDM identified by risk prediction tool, agreement to complete an OGTT at 28 weeks' gestation. Exclusion criteria: multiple pregnancies, type 1 or 2 diabetes, a BMI $\geq 45$ kg/m <sup>2</sup> , pre-existing chronic medical conditions, and non-English-speaking | Australia | Pre-pregnancy: self-reported<br>Early pregnancy: measured at 12-15 weeks' gestation. | Mixed        | Behaviour change lifestyle intervention with four individual sessions based on the Social Cognitive Theory, at 14-16, 20, 24, and 28 weeks' gestation. Provided with simple healthy eating and physical activity messages. Behavioural change strategies were practised to identify short-term goals, and increase self-efficacy and self-monitoring. Goals were determined individually by the participants. Self-monitoring strategies included pedometers and the use of weight gain charts. | GWG, GDM screening                                                                                                                                                                                                  | 238                             | 187 (78.6%)                  |
| Jeffries <i>et al.</i> (2009) | July and October 2007      | Inclusion criteria: $\leq 14$ weeks' gestation. Exclusion criteria were: age $< 18$ years or $> 45$ years, type 1 or type 2 diabetes mellitus, multiple pregnancy, or non-English speaking.                                                                                                                                                                                                                                                                                         | Australia | Pre-pregnancy self-reported.<br>Early pregnancy: measured at 14 weeks' gestation     | Mixed        | Advised on optimal GWG based on IOM 1990 guidelines. Provided with a personalised weight measurement card and instructed to record their weight at 16, 20, 24, 28, 30, 32 and 34 weeks' gestation.                                                                                                                                                                                                                                                                                              | GWG, adherence to IOM guidelines (1990)                                                                                                                                                                             | 286                             | 236 (82.5%)                  |
| Khaledan <i>et al.</i> (2010) | Not described              | Inclusion criteria: Singleton, healthy pregnancy. Exclusion criteria: chronic disease, multiple pregnancy, complications, risk of preterm delivery, hypertension, severe anaemia, type 1 diabetes with poor control, morbid obesity, low maternal weight, history of completely sedentary lifestyle, heavy smoker.                                                                                                                                                                  | Iran      | Pre-pregnancy: na.<br>Early pregnancy: Not described                                 | Exercise     | Aerobic (stepping) and flexibility exercise session three times per week (30-45 minutes each) for eight weeks.                                                                                                                                                                                                                                                                                                                                                                                  | Type of delivery, cause of caesarean section, maternal and fetal weight, birth weight and gestational age                                                                                                           | 39                              | 37 (94.9%)                   |
| Khoury <i>et al.</i> (2005)   | June 1999 to November 2001 | Inclusion criteria: 17-20 weeks' gestation, singleton, healthy pregnancy, non-smoker (or stopped $\geq 5$ years previously), 21-38 years, BMI 19-32 kg/m <sup>2</sup> . Exclusion criteria: following a vegetarian or Mediterranean diet, immigrant to Norway from non-Western country, high-risk pregnancy, complications in a previous pregnancy, on-going hyperemesis gravidarum or bleeding after gestational week 12                                                           | Norway    | Pre-pregnancy: na.<br>Early pregnancy: measured at 17-20 week's gestation            | Diet         | Dietary advice from dietitian at inclusion, 24, 30 and 36 weeks' gestation. Cholesterol-lowering diet; promoted fish, low-fat meats and dairy products, oils, whole grains, fruits, vegetables, and legumes from gestational week 17-20 until delivery.                                                                                                                                                                                                                                         | Maternal, cord, and neonatal plasma lipids and pregnancy-related complications, including hypertensive complications, preterm delivery, and intrauterine growth restriction, birth weight and maternal weight gain. | 290                             | 198 (68.3%)                  |

**Table S1. cont.**

| Author (Year)                   | Period                       | Original inclusion/exclusion criteria                                                                                                                                                                                                                                                                                                                                                                                                                                                      | Country     | Method to measure GWG                                                            | Intervention | Intervention Detail                                                                                                                                                                                                                                                                                                        | Outcome                                                                                                          | Original i-WIP N (%) in this analysis |
|---------------------------------|------------------------------|--------------------------------------------------------------------------------------------------------------------------------------------------------------------------------------------------------------------------------------------------------------------------------------------------------------------------------------------------------------------------------------------------------------------------------------------------------------------------------------------|-------------|----------------------------------------------------------------------------------|--------------|----------------------------------------------------------------------------------------------------------------------------------------------------------------------------------------------------------------------------------------------------------------------------------------------------------------------------|------------------------------------------------------------------------------------------------------------------|---------------------------------------|
| Nascimento <i>et al.</i> (2011) | August 2008 to October 2009  | Inclusion criteria: overweight or obese, age >18 years, 14-24 weeks' gestation. Exclusion criteria: multiple gestations, exercising regularly, conditions that contraindicate exercise                                                                                                                                                                                                                                                                                                     | Brazil      | Pre-pregnancy self-reported. Early pregnancy: measured at 14-24 weeks' gestation | Exercise     | One exercise class per week (40 minutes each), under the guidance of a trained physical therapist. Light-intensity to moderate-intensity exercises. Advised to exercise at home five times per week.                                                                                                                       | GWG, maternal arterial blood pressure and perinatal outcome, perception of quality of life.                      | 82<br>77 (93.9%)                      |
| Oostdam <i>et al.</i> (2012)    | November 2007 and April 2010 | Inclusion criteria: obese or overweight and at least one of the following characteristics: history of macrosomia; history of GDM; or first-grade relative with type 2 diabetes. Exclusion criteria: >20 weeks' gestation; <18 years; inadequate knowledge of Dutch language; GDM; hypertension; alcohol abuse; drug abuse; use of any medication that affects insulin secretion or insulin sensitivity; chronic disease that could prevent the woman from implementing the study protocol. | Netherlands | Pre-pregnancy self-reported. Early pregnancy: measured at 15-20 weeks' gestation | Exercise     | Aerobic and strength exercise classes (FitFor2 Study). Two days per week (60 minutes each), under supervision of physiotherapist, from 14-20 weeks' gestation to end of pregnancy.                                                                                                                                         | Fasting blood glucose, insulin, HbA1c; body weight, BMI, daily physical activity, birth weight and fetal growth. | 124<br>75 (60.5%)                     |
| Petrella <i>et al.</i> (2014)   | April 2011 to October 2011   | Inclusion criteria: Pre-pregnancy BMI $\geq 25$ kg/m <sup>2</sup> , >18 years and singleton pregnancy. Exclusion criteria: twin pregnancy, chronic diseases (i.e. diabetes mellitus, chronic hypertension, untreated thyroid diseases), previous GDM, smoker, previous bariatric surgery, regular physical activity, dietary supplements or herbal products known to affect body weight, other medical conditions that might affect body weight, and plans to deliver outside the centre   | Italy       | Pre-pregnancy self-reported. Early pregnancy: measured at 12 weeks' gestation    | Mixed        | Diet, physical activity and counselling about GWG. Dietary advice: low glycaemic index diet, three main meals and three snacks (1500 kcal/day). Physical activity advice: 3 days per week of moderate intensity activity (30 minutes each), monitored using pedometer. One-hour counselling session about appropriate GWG. | Excessive weight gain, gestational diabetes mellitus, gestational hypertension and preterm delivery.             | 61<br>58 (95.1%)                      |

Table S1. cont.

| Author (Year)               | Period                  | Original inclusion/exclusion criteria                                                                                                                                                                                                                                                                                                                                                                                                                                                       | Country | Method to measure GWG                                                            | Intervention | Intervention Detail                                                                                                                                                                                                                                                                                                                                                                                                                                                                                                                                                                                                                                                 | Outcome                                                                                            | Original i-WIP N (%) in this analysis |
|-----------------------------|-------------------------|---------------------------------------------------------------------------------------------------------------------------------------------------------------------------------------------------------------------------------------------------------------------------------------------------------------------------------------------------------------------------------------------------------------------------------------------------------------------------------------------|---------|----------------------------------------------------------------------------------|--------------|---------------------------------------------------------------------------------------------------------------------------------------------------------------------------------------------------------------------------------------------------------------------------------------------------------------------------------------------------------------------------------------------------------------------------------------------------------------------------------------------------------------------------------------------------------------------------------------------------------------------------------------------------------------------|----------------------------------------------------------------------------------------------------|---------------------------------------|
| Phelan <i>et al.</i> (2011) | 2006 to 2008            | Inclusion criteria: 10 - 16 week's gestation, BMI 19.8 - 40 kg/m <sup>2</sup> , non-smoking, >18 years, fluency in English, access to a telephone, and a singleton pregnancy. Exclusion criteria: self-reported major health or psychiatric diseases, weight loss during pregnancy, or a history of >3 miscarriages                                                                                                                                                                         | USA     | Pre-pregnancy self-reported. Early pregnancy: measured at 10-16 weeks' gestation | Mixed        | Behavioural intervention with diet and physical activity advice (Fit for Delivery Study). One face-to-face visit to discuss appropriate GWG, physical activity (30 min of walking most days of the week), and calorie goals (20 kcal/kg), with daily self-monitoring of eating, exercise, and weight. Provided with weight scales, food records, pedometers, weekly reminders, personalised graphs of weight gained with feedback, 3 supportive phone calls from the dietitian. If gained over or under weight gain guidelines received 2 additional supportive phone calls per month with meal plans and goals until weight gains returned to appropriate amounts. | GWG and the proportion who returned to pre-gravid weights by 6 months' postpartum.                 | 401<br><hr/> 395 (98.5%)              |
| Poston <i>et al.</i> (2015) | March 2009 to June 2014 | Inclusion criteria: >16 years, BMI ≥30 kg/m <sup>2</sup> , singleton pregnancy, 15 - 18(+6) weeks' gestation. Exclusion criteria: unwilling or unable to give informed consent; underlying disorders, including a pre-pregnancy diagnosis of essential hypertension, diabetes, renal disease, systemic lupus erythematosus, antiphospholipid syndrome, sickle-cell disease, thalassaemia, coeliac disease, thyroid disease, and current psychosis; or currently being prescribed metformin. | UK      | Pre-pregnancy: na. Early pregnancy: measured at 15-18 week's gestation           | Mixed        | Behavioural intervention with diet and physical activity advice (UPBEAT Study). One individual interview plus one group/individual session per week (60 minutes each) for 8 weeks. Advised to self-monitor, identify, and problem-solve of barriers to behaviour change and enlist social support. Dietary intervention aimed to promote a healthy pattern of eating and low glycaemic index diet. Exercise advice focused on incremental increases in walking from a pedometer-assessed baseline, tailored to pre-existing activities.                                                                                                                             | Gestational diabetes and large-for-gestational-age infants (≥90th customised birth weight centile) | 1554<br><hr/> 378 (24.3%)             |

Table S1. cont.

| Author (Year)                | Period                           | Original inclusion/exclusion criteria                                                                                                                                                                                                                                                                                                                                                                                         | Country | Method to measure GWG                                                                | Intervention | Intervention Detail                                                                                                                                                                                                                                                                                                                                                                                                                                                                                                          | Outcome                                                                                                                                                                       | Original i-WIP N (%) in this analysis |
|------------------------------|----------------------------------|-------------------------------------------------------------------------------------------------------------------------------------------------------------------------------------------------------------------------------------------------------------------------------------------------------------------------------------------------------------------------------------------------------------------------------|---------|--------------------------------------------------------------------------------------|--------------|------------------------------------------------------------------------------------------------------------------------------------------------------------------------------------------------------------------------------------------------------------------------------------------------------------------------------------------------------------------------------------------------------------------------------------------------------------------------------------------------------------------------------|-------------------------------------------------------------------------------------------------------------------------------------------------------------------------------|---------------------------------------|
| Rauh <i>et al.</i> (2013)    | February 2010 and August 2011    | Inclusion criteria: >18 years; singleton pregnancy; <18 weeks' gestation; BMI $\geq 18.5$ kg/m <sup>2</sup> , and sufficient German. Exclusion criteria: any condition preventing physical activity, GDM and uncontrolled chronic diseases that may affect weight development like thyroid dysfunction or psychiatric diseases                                                                                                | Germany | Pre-pregnancy self-reported. Early pregnancy: measured at 10-16 weeks' gestation     | Mixed        | Individual counselling sessions on nutrition, physical activity, and GWG monitoring (FeLIPO Study). Twice during pregnancy; 20th (60 minutes) and 30th (30 minutes) week of gestation. Provided with general healthy lifestyle information; prompted to self-monitor behaviour by recording diet, physical activity, and weight gain using weight gain charts; and to set behavioural goals based on the baseline situation (BMI, diet, physical activity) and individual preferences.                                       | Weight gain in excess of IOM recommendations, and weight retention at 4 months' postpartum                                                                                    | 250<br><hr/> 231 (92.4%)              |
| Renault <i>et al.</i> (2014) | March 2009 to March 2012         | Inclusion criteria: >18 years, singleton pregnancy, normal scan in weeks 11-14, <16 weeks' gestation, sufficient Danish. Exclusion criteria: multiple pregnancy, pre-gestational diabetes, or other serious diseases limiting level of physical activity, previous bariatric surgery, or alcohol or drug abuse.                                                                                                               | Denmark | Pre-pregnancy self-reported. Early pregnancy: measured at 11-16 weeks' gestation     | Mixed        | Physical activity intervention with or without dietary intervention (TOP Study). Physical activity advice: daily step count of 11,000, monitored with pedometer. Diet: hypocaloric (1200-1675 kcal), low-fat, Mediterranean-style diet and contact with an experienced dietitian every 2 weeks, alternating between outpatient visits and phone contacts (measurement of weight, encouragement, and correcting advice on the diet).                                                                                          | GWG, pregnancy complications and delivery complications.                                                                                                                      | 425<br><hr/> 370 (87.1%)              |
| Sagedal <i>et al.</i> (2017) | September 2009 and February 2013 | Inclusion criteria: Nulliparous, singleton pregnancy, $\leq 20$ weeks' gestation, pre-pregnancy BMI of $\geq 19$ kg/m <sup>2</sup> , sufficient in Norwegian or English, and provided signed, informed consent. Exclusion criteria: pre-existing diabetes, disabilities precluding participation in a physical fitness programme, continued substance abuse, or planned relocation outside of the study area before delivery. | Norway  | Pre-pregnancy self-reported. Early pregnancy: measured at $\leq 20$ weeks' gestation | Mixed        | Lifestyle intervention with diet and physical activity components (Norwegian Fit for Delivery Study). Dietary advice provided by telephone, with one initial consultation and follow-up 4-6 weeks later (20 minutes). Dietary advice aimed to increase awareness of food choices. GWG based on pre-pregnancy BMI provided. Physical activity: access to exercise classes at a local gym twice/week (60 minutes). Provided with booklets, access to study website, invitation to one cooking class and to an evening meeting. | GWG, birth weight of term infants, maternal fasting glucose levels at 30 weeks of gestation, maternal percentage of fat, incidence of operative deliveries, postpartum weight | 606<br><hr/> 576 (95.0%)              |

**Table S1. cont.**

| Author (Year)               | Period                                                   | Original inclusion/exclusion criteria                                                                                                                                                                                                                        | Country | Method to measure GWG                                                                              | Intervention | Intervention Detail                                                                                                                                                                                                                                                                                                                                                                                                                                                                                                                                                           | Outcome                                                                                                                                                                        | Original N | i-WIP (%) in this analysis |
|-----------------------------|----------------------------------------------------------|--------------------------------------------------------------------------------------------------------------------------------------------------------------------------------------------------------------------------------------------------------------|---------|----------------------------------------------------------------------------------------------------|--------------|-------------------------------------------------------------------------------------------------------------------------------------------------------------------------------------------------------------------------------------------------------------------------------------------------------------------------------------------------------------------------------------------------------------------------------------------------------------------------------------------------------------------------------------------------------------------------------|--------------------------------------------------------------------------------------------------------------------------------------------------------------------------------|------------|----------------------------|
| Stafne <i>et al.</i> (2012) | April 2007 to June 2009 and October 2007 to January 2009 | Inclusion criteria: Residing within 30 min drive from the hospital and available to attend weekly appointment, ≥18 years, singleton pregnancy. Exclusion criteria: High-risk pregnancies, diseases that could interfere with participation.                  | Norway  | Pre-pregnancy: na. Early pregnancy: measured at 18-22 week's gestation                             | Exercise     | Exercise sessions, once per week for 12 weeks (60 minutes each), in groups of 8–15 women, instructed by a physiotherapist. Offered between 20 and 36 weeks of pregnancy. Included aerobic activity, strength training and balance exercises. Women encouraged to follow a written home exercise program at least twice per week (45 minutes each).                                                                                                                                                                                                                            | Self-reported lumbopelvic pain and sick leave due to lumbopelvic pain.                                                                                                         | 855        | 699 (81.8%)                |
| Vinter <i>et al.</i> (2011) | October 2007 to October 2010                             | Inclusion criteria: 18–40 years, 10–14 weeks' gestation, BMI 30–45 kg/m <sup>2</sup> . Exclusion criteria: chronic medical conditions, prior serious obstetric complications, alcohol or drug abuse, non-Danish speaking, multiple pregnancy, positive OGTT. | Denmark | Pre-pregnancy: self-reported. Early pregnancy: measured at 10-14 week's gestation                  | Mixed        | Dietary counselling and physical activity (The LiP Study - Lifestyle in Pregnancy). Four dietary counselling by dietitians at 15, 20, 28, and 35 weeks' gestation. Dietary advice was based on the official Danish recommendations, and aimed to limit GWG to 5 kg. Provided with free full-time membership in a fitness centre for 6 months, with exercise classes once per week (60 minutes each) with physiotherapists. Encouraged to be moderately physically active every day (30–60 minutes per day), provided with a pedometer to motivate and improve daily activity. | GWG, preeclampsia, pregnancy-induced hypertension, GDM, caesarean section, macrosomia, and admission to neonatal intensive care unit.                                          | 304        | 292 (96.1%)                |
| Vitolo <i>et al.</i> (2011) | January 2007 to May 2008                                 | Inclusion criteria: 10-29 weeks' gestation. Exclusion criteria: positive HIV test previous diagnosis of diabetes, hypertension, anaemia, any conditions preventing women from undertaking, exercise in pregnancy, and >35 years                              | Brazil  | Pre-pregnancy: self-reported. Early pregnancy: collected in first trimester (method not described) | Diet         | Dietary counselling provided according to nutritional needs. Underweight women advised to increase energy density of the diet, include two high-energy snacks and fruit daily. Well-nourished women advised to consume six portions fruit and vegetables and restrict energy dense foods. Overweight women were advised on meal timing, portion sizes, to restrict energy dense and processed foods.                                                                                                                                                                          | GWG, gestational diabetes, pre-eclampsia, infant birth and premature delivery (<37wks), 1st and 5th min Apgar score, head circumference, type of delivery, birth weight <2500g | 315        | 268 (85.1%)                |

**Table S1. cont.**

| Author (Year)              | Period                       | Original inclusion/exclusion criteria                                                                                                                                                                                                                                                                           | Country | Method to measure GWG                                                          | Intervention | Intervention Detail                                                                                                                                                                                                                                                                                                            | Outcome                                                                                                    | Original N | i-WIP (%) in this analysis |
|----------------------------|------------------------------|-----------------------------------------------------------------------------------------------------------------------------------------------------------------------------------------------------------------------------------------------------------------------------------------------------------------|---------|--------------------------------------------------------------------------------|--------------|--------------------------------------------------------------------------------------------------------------------------------------------------------------------------------------------------------------------------------------------------------------------------------------------------------------------------------|------------------------------------------------------------------------------------------------------------|------------|----------------------------|
| Walsh <i>et al.</i> (2012) | January 2007 to January 2011 | Inclusion criteria: Secundigravid women, previous macrosomic infant ( $\geq 4$ kg). Exclusion criteria: underlying medical disorders, including a previous history of gestational diabetes, use of any drugs, unable to provide full informed consent, <18 years, >18 weeks' gestation, and multiple pregnancy. | Ireland | Pre-pregnancy: na. Early pregnancy: measured at 12-15 week's gestation         | Diet         | One dietary education session (2 hours), with the research dietitian, at 15 weeks' gestation, groups of 2-6 women. Reinforcement of diet at 28 and 34 weeks' gestation. Advised on a low glycaemic index diet, and general healthy eating guidelines for pregnancy. Received written resources about low glycaemic index diet. | Birth weight, GWG, glucose intolerance.                                                                    | 800        | 517 (64.6%)                |
| Wolff <i>et al.</i> (2008) | Not described                | Inclusion criteria: non-diabetic, Caucasian, BMI $>30$ kg/m <sup>2</sup> , 15 weeks' gestation. Exclusion criteria: smoker, <18 or >45 years, multiple pregnancy, medical complications known to affect fetal growth adversely or to contraindicate limitation of weight gain.                                  | Denmark | Pre-pregnancy: self-reported. Early pregnancy: measured at 15 week's gestation | Diet         | Dietary consultations with a dietitian, 10 times during pregnancy (60 minutes each). Advised to eat a healthy diet according to the official Danish dietary recommendations. Aim to restrict GWG to 6–7kg.                                                                                                                     | GWG, pregnancy-induced increases in insulin, leptin, and glucose. Weight retentions at 4 weeks' postpartum | 59         | 55 (93.2%)                 |

GWG: gestational weight gain; BMI: body mass index; GDM: gestational diabetes; OGTT: oral glucose tolerance test; IOM: Institute of Medicine



**Table S2. Global classification of risk of bias on study level for trials included**

| Study Team                      | Item 1:       | Item 2:                | Item 3:                  | Item 4:                        | Item 5:                 | Item 6:             | Global       |
|---------------------------------|---------------|------------------------|--------------------------|--------------------------------|-------------------------|---------------------|--------------|
|                                 | Randomisation | Allocation concealment | Blinding of participants | Blinding of outcome Assessment | Incomplete outcome data | Selective reporting | Risk of bias |
| Althuizen <i>et al.</i> (2013)  | ⊕             | ⊕                      | ⊕?                       | ⊕                              | ⊕                       | ⊕?                  | Low/Medium   |
| Baciuk <i>et al.</i> (2008)     | ⊕             | ⊕                      | ⊖                        | ⊕                              | ⊕                       | ⊕                   | Low/Medium   |
| Bogaerts <i>et al.</i> (2013)   | ⊕             | ⊕?                     | ⊖                        | ⊖                              | ⊕                       | ⊕                   | High         |
| Haakstad <i>et al.</i> (2011)   | ⊕             | ⊕                      | ⊕?                       | ⊕                              | ⊕                       | ⊖                   | Low/Medium   |
| Harrison <i>et al.</i> (2013)   | ⊕             | ⊕                      | ⊕?                       | ⊕                              | ⊕                       | ⊕                   | Low/Medium   |
| Jeffries <i>et al.</i> (2009)   | ⊕             | ⊕                      | ⊕?                       | ⊕                              | ⊕                       | ⊕                   | Low/Medium   |
| Khaledan <i>et al.</i> (2010)   | ⊕             | ⊕?                     | ⊖                        | ⊖                              | ⊕                       | ⊕                   | High         |
| Khoury <i>et al.</i> (2005)     | ⊕             | ⊕                      | ⊕?                       | ⊕                              | ⊕                       | ⊕                   | Low/Medium   |
| Nascimento <i>et al.</i> (2011) | ⊕             | ⊕                      | ⊖                        | ⊖                              | ⊕                       | ⊕                   | High         |
| Oostdam <i>et al.</i> (2012)    | ⊕             | ⊕                      | ⊖                        | ⊕                              | ⊖                       | ⊕                   | High         |
| Petrella <i>et al.</i> (2014)   | ⊕             | ⊖                      | ⊖                        | ⊖                              | ⊕                       | ⊖                   | High         |
| Phelan <i>et al.</i> (2011)     | ⊕             | ⊕                      | ⊕?                       | ⊕                              | ⊕                       | ⊕                   | Low/Medium   |
| Poston <i>et al.</i> (2015)     | ⊕?            | ⊕?                     | ⊖                        | ⊖                              | ⊕?                      | ⊕?                  | High         |
| Rauh <i>et al.</i> (2013)       | ⊕             | ⊕                      | ⊖                        | ⊖                              | ⊕                       | ⊕?                  | High         |
| Renault <i>et al.</i> (2014)    | ⊕             | ⊕                      | ⊖                        | ⊖                              | ⊕                       | ⊖                   | High         |
| Sagedal <i>et al.</i> (2016)    | ⊕             | ⊕                      | ⊕?                       | ⊕                              | ⊕?                      | ⊕?                  | Low/Medium   |
| Stafne <i>et al.</i> (2012)     | ⊕             | ⊕                      | ⊖                        | ⊖                              | ⊕                       | ⊕                   | High         |
| Vinter <i>et al.</i> (2011)     | ⊕             | ⊕                      | ⊖                        | ⊖                              | ⊕                       | ⊖                   | High         |
| Vitolo <i>et al.</i> (2011)     | ⊕             | ⊖                      | ⊖                        | ⊕                              | ⊕                       | ⊖                   | High         |
| Walsh <i>et al.</i> (2012)      | ⊕             | ⊕                      | ⊖                        | ⊕?                             | ⊕                       | ⊖                   | Low/Medium   |
| Wolff <i>et al.</i> (2008)      | ⊕             | ⊕                      | ⊕?                       | ⊖                              | ⊖                       | ⊕                   | High         |
| <b>Legend</b>                   |               |                        |                          |                                |                         |                     |              |
| ⊕                               | ⊖             | ⊕?                     |                          |                                |                         |                     |              |
| Low                             | High          | Unclear                |                          |                                |                         |                     |              |

**Table S3. Individual Study Results – Gestational Weight Gain per Week**

|                                 |           | Intervention   |      |      | Control |      |      | Mean Difference<br>(95% CI) | P*    |
|---------------------------------|-----------|----------------|------|------|---------|------|------|-----------------------------|-------|
| Study name                      | Education | N              | Mean | SD   | N       | Mean | SD   |                             |       |
| Althuizen <i>et al.</i> (2013)  | Lower     | 49             | 0.39 | 0.34 | 49      | 0.47 | 0.26 | -0.08 (-0.02, 0.04)         | 0.205 |
|                                 | Higher    | 40             | 0.47 | 0.20 | 49      | 0.43 | 0.27 | 0.04 (-0.06, 0.15)          | 0.391 |
| Baciuk <i>et al.</i> (2008)     | Lower     | 29             | 0.48 | 0.23 | 31      | 0.51 | 0.25 | -0.04 (-0.16, 0.09)         | 0.561 |
|                                 | Higher    | 4              | 0.41 | 0.19 | 4       | 0.52 | 0.31 | -0.11 (-0.55, 0.33)         | 0.557 |
| Bogaerts <i>et al.</i> (2013)   | Lower     | 73             | 0.31 | 0.26 | 40      | 0.41 | 0.25 | -0.10 (-0.21, 0.01)         | 0.064 |
|                                 | Higher    | 60             | 0.29 | 0.24 | 23      | 0.42 | 0.28 | -0.14 (-0.27, -0.01)        | 0.044 |
| Haakstad <i>et al.</i> (2011)   | Lower     | 7              | 0.47 | 0.15 | 6       | 0.39 | 0.18 | 0.08 (-0.13, 0.29)          | 0.411 |
|                                 | Higher    | 34             | 0.48 | 0.17 | 36      | 0.51 | 0.17 | -0.03 (-0.11, 0.05)         | 0.432 |
| Harrison <i>et al.</i> (2013)   | Lower     | 56             | 0.41 | 0.18 | 56      | 0.46 | 0.25 | -0.05 (-0.13, 0.03)         | 0.197 |
|                                 | Higher    | 40             | 0.44 | 0.19 | 35      | 0.47 | 0.26 | -0.02 (-0.13, 0.08)         | 0.668 |
| Jeffries <i>et al.</i> (2009)   | Lower     | 42             | 0.45 | 0.18 | 32      | 0.47 | 0.14 | -0.03 (-0.12, 0.05)         | 0.498 |
|                                 | Higher    | 83             | 0.43 | 0.17 | 79      | 0.46 | 0.16 | -0.03 (-0.08, 0.03)         | 0.401 |
| Khaledan <i>et al.</i> (2010)   | Lower     | 11             | 0.61 | 0.26 | 14      | 0.73 | 0.33 | -0.12 (-0.38, 0.13)         | 0.336 |
|                                 | Higher    | 6              | 0.55 | 0.23 | 6       | 0.51 | 0.17 | 0.04 (-0.22, 0.30)          | 0.736 |
| Khoury <i>et al.</i> (2005)     | Lower     | 21             | 0.56 | 0.20 | 14      | 0.54 | 0.17 | 0.01 (-0.12, 0.15)          | 0.822 |
|                                 | Higher    | 74             | 0.52 | 0.19 | 89      | 0.57 | 0.17 | -0.05 (-0.10, 0.01)         | 0.108 |
| Nascimento <i>et al.</i> (2011) | Lower     | 34             | 0.37 | 0.22 | 39      | 0.40 | 0.22 | -0.03 (-0.13, 0.07)         | 0.562 |
|                                 | Higher    | 3              | 0.40 | 0.07 | 1       | 0.80 | na   | -0.40 (-0.73, -0.07)        | 0.035 |
| Oostdam <i>et al.</i> (2012)    | Lower     | 28             | 0.41 | 0.34 | 24      | 0.32 | 0.20 | 0.09 (-0.07, 0.25)          | 0.245 |
|                                 | Higher    | 10             | 0.40 | 0.21 | 13      | 0.44 | 0.21 | -0.04 (-0.22, 0.14)         | 0.680 |
| Petrella <i>et al.</i> (2014)   | Lower     | 25             | 0.22 | 0.29 | 27      | 0.33 | 0.22 | -0.11 (-0.26, 0.04)         | 0.137 |
|                                 | Higher    | 5              | 0.34 | 0.12 | 1       | 0.35 | na   | -0.01 (-0.39, 0.37)         | 0.950 |
| Phelan <i>et al.</i> (2011)     | Lower     | 27             | 0.50 | 0.25 | 36      | 0.46 | 0.19 | 0.04 (-0.07, 0.15)          | 0.469 |
|                                 | Higher    | 170            | 0.48 | 0.16 | 162     | 0.52 | 0.19 | -0.03 (-0.07, 0.01)         | 0.094 |
| Poston <i>et al.</i> (2015)     | Lower     | 113            | 0.26 | 0.20 | 120     | 0.27 | 0.22 | 0.00 (-0.06, 0.06)          | 0.853 |
|                                 | Higher    | 66             | 0.20 | 0.21 | 79      | 0.26 | 0.20 | -0.06 (-0.14, 0.01)         | 0.116 |
| Rauh <i>et al.</i> (2013)       | Lower     | 64             | 0.45 | 0.15 | 43      | 0.45 | 0.18 | -0.03 (-0.11, 0.04)         | 0.904 |
|                                 | Higher    | 89             | 0.43 | 0.13 | 35      | 0.47 | 0.15 | -0.07 (-0.13, -0.01)        | 0.120 |
| Renault <i>et al.</i> (2014)    | Lower     | 56             | 0.38 | 0.22 | 28      | 0.48 | 0.22 | -0.09 (-0.20, 0.01)         | 0.082 |
|                                 | Higher    | 186            | 0.35 | 0.21 | 100     | 0.39 | 0.19 | -0.04 (-0.09, 0.01)         | 0.169 |
| Sagedal <i>et al.</i> (2017)    | Lower     | 89             | 0.54 | 0.21 | 93      | 0.57 | 0.21 | -0.03 (-0.09, 0.03)         | 0.339 |
|                                 | Higher    | 199            | 0.48 | 0.20 | 195     | 0.52 | 0.19 | -0.04 (-0.08, 0.00)         | 0.037 |
| Stafne <i>et al.</i> (2012)     | Lower     | 31             | 0.53 | 0.15 | 38      | 0.59 | 0.23 | -0.06 (-0.16, 0.03)         | 0.178 |
|                                 | Higher    | 339            | 0.51 | 0.17 | 291     | 0.52 | 0.17 | -0.01 (-0.03, 0.02)         | 0.617 |
| Vinter <i>et al.</i> (2011)     | Lower     | 59             | 0.31 | 0.25 | 69      | 0.36 | 0.22 | -0.06 (-0.15, 0.03)         | 0.212 |
|                                 | Higher    | 85             | 0.33 | 0.20 | 79      | 0.38 | 0.22 | -0.05 (-0.12, 0.02)         | 0.158 |
| Vitolo <i>et al.</i> (2011)     | Lower     | 79             | 0.41 | 0.18 | 83      | 0.45 | 0.21 | -0.04 (-0.10, 0.02)         | 0.199 |
|                                 | Higher    | 61             | 0.42 | 0.15 | 45      | 0.49 | 0.22 | -0.07 (-0.15, 0.00)         | 0.053 |
| Walsh <i>et al.</i> (2012)      | Lower     | 60             | 0.46 | 0.16 | 62      | 0.52 | 0.21 | -0.06 (-0.13, 0.01)         | 0.077 |
|                                 | Higher    | 188            | 0.49 | 0.16 | 207     | 0.53 | 0.18 | -0.04 (-0.08, -0.01)        | 0.021 |
| Wolff <i>et al.</i> (2008)      | Lower     | 26             | 0.26 | 0.16 | 27      | 0.40 | 0.24 | -0.14 (-0.25, -0.02)        | 0.021 |
|                                 | Higher    | 0 <sup>†</sup> | na   |      | 2       | 0.38 | 0.24 | na                          | na    |

Mean difference is calculated as intervention minus control

\* P-value is independent-sample t-test between intervention and control

† T-test cannot be computed because at least one of the groups is empty.

Lower education: secondary education or less. Higher education: at least some tertiary education

**Table S4. Comparison of maternal characteristics among women included and excluded in the IPD meta-analysis.**

|                                                          | Included |                    | Excluded |                     | P*     |
|----------------------------------------------------------|----------|--------------------|----------|---------------------|--------|
|                                                          | N        |                    | N        |                     |        |
| <b>Early pregnancy weight (kg) <sup>a</sup></b>          | 5183     | 78.60 (18.56)      | 4814     | 87.78 (51.06)       | 0.002  |
| <b>Pre-pregnancy weight (kg) <sup>a</sup></b>            | 5183     | 76.06 (18.74)      | 2398     | 85.82 (123.03)      | 0.030  |
| <b>Height (cm) <sup>a</sup></b>                          | 5183     | 166.07 (7.03)      | 6697     | 169.30 (63.03)      | <0.001 |
| <b>Pre-pregnancy BMI (kg/m<sup>2</sup>) <sup>a</sup></b> | 5183     | 27.57 (6.55)       | 2615     | 27.31 (12.56)       | <0.001 |
| <b>Gestational age (weeks)</b>                           |          |                    |          |                     |        |
| <b>Baseline <sup>c</sup></b>                             | 5183     | 14.5 (4.0 - 32.0)  | 4478     | 14.0 (11.0 – 17.0)  | <0.001 |
| <b>Final follow-up <sup>c</sup></b>                      | 5183     | 36.6 (24.0 - 44.0) | 6995     | 38.0 (35.0 – 41.0)  | <0.001 |
| <b>Delivery <sup>c</sup></b>                             | 5172     | 39.7 (26.0 - 44.0) | 7007     | 40.0 (38.85 – 41.0) | 0.022  |
| <b>Infant birth weight (g) <sup>a</sup></b>              | 5164     | 3531.73 (547.90)   | 7026     | 3701.22 (1479.82)   | <0.001 |
| <b>Maternal age (years) <sup>a</sup></b>                 | 5183     | 29.90 (4.97)       | 7041     | 30.80 (8.36)        | <0.001 |
| <b>Ethnicity</b>                                         |          |                    |          |                     |        |
| Caucasian <sup>b</sup>                                   | 3725     | 3291 (88.3)        | 6415     | 5588 (87.1)         | <0.001 |
| Asian <sup>b</sup>                                       |          | 84 (0.02)          |          | 231 (0.04)          |        |
| Black <sup>b</sup>                                       |          | 123 (0.03)         |          | 462 (0.08)          |        |
| Central/South American <sup>b</sup>                      |          | 88 (0.02)          |          | 47 (0.01)           |        |
| Middle East (including Iran & Turkey) <sup>b</sup>       |          | 63 (0.01)          |          | 13 (0.00)           |        |
| Other <sup>b</sup>                                       |          | 76 (0.02)          |          | 74 (0.01)           |        |

Data are presented as <sup>a</sup> mean (SD) <sup>b</sup> n (%) and <sup>c</sup> mean (range of minimum and maximum).

\*P-value: T-tests and chi-square

Figure S1. Assessment of small study effects on trials in IPD meta-analysis of low educational attainment and gestational weight gain per week, controlling for BMI and intervention.

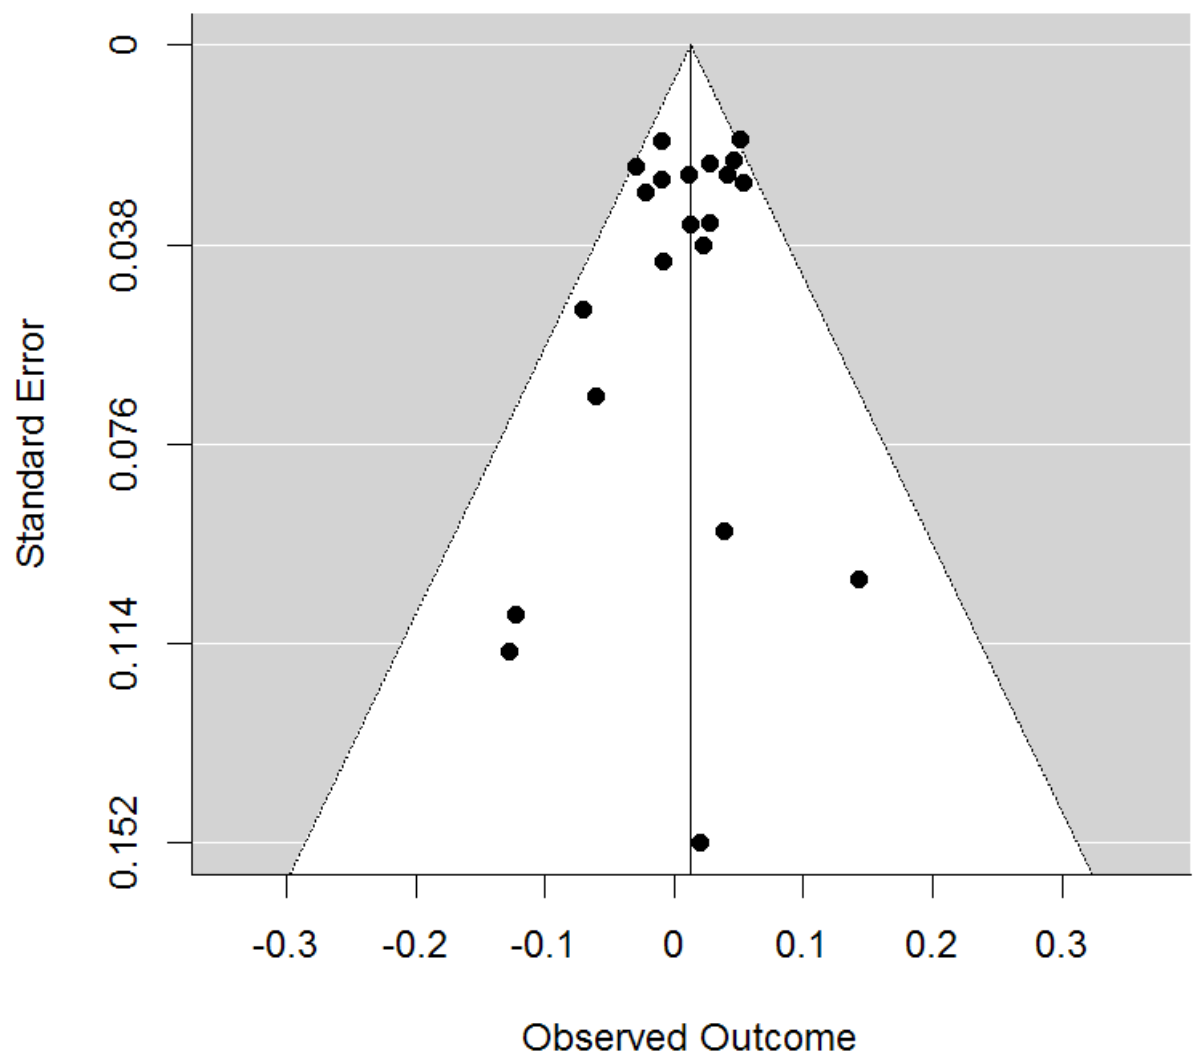

**Figure S2. Forest plot of the IPD meta-analysis of low educational attainment (treatment effect [TE]) and gestational weight gain per week, controlling for BMI and intervention.**

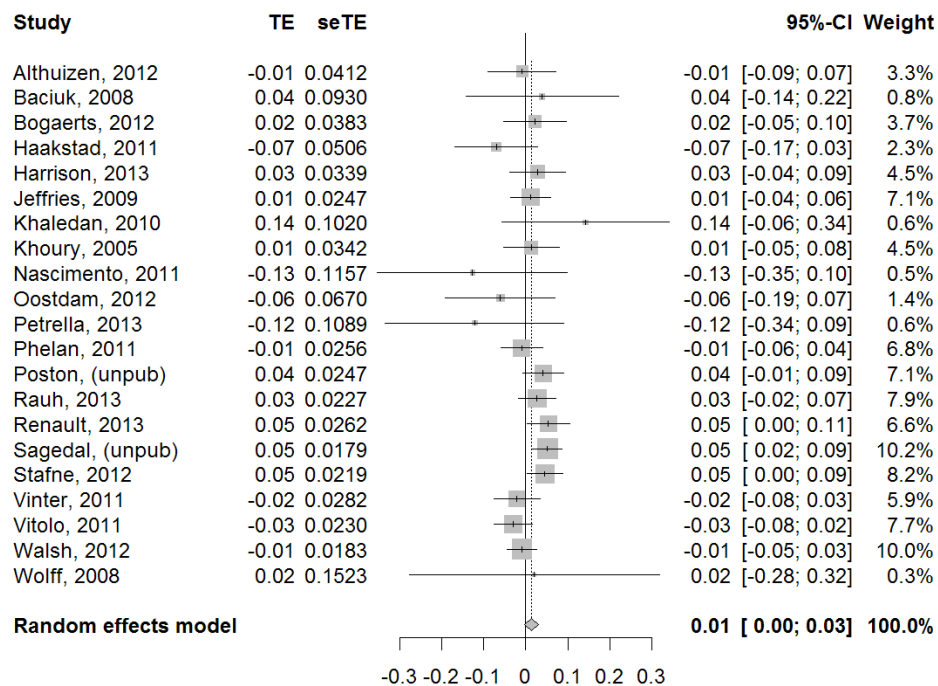

## Appendix 1. Identification and selection of studies in individual participant data (IPD) meta-analysis for the i-WIP Database

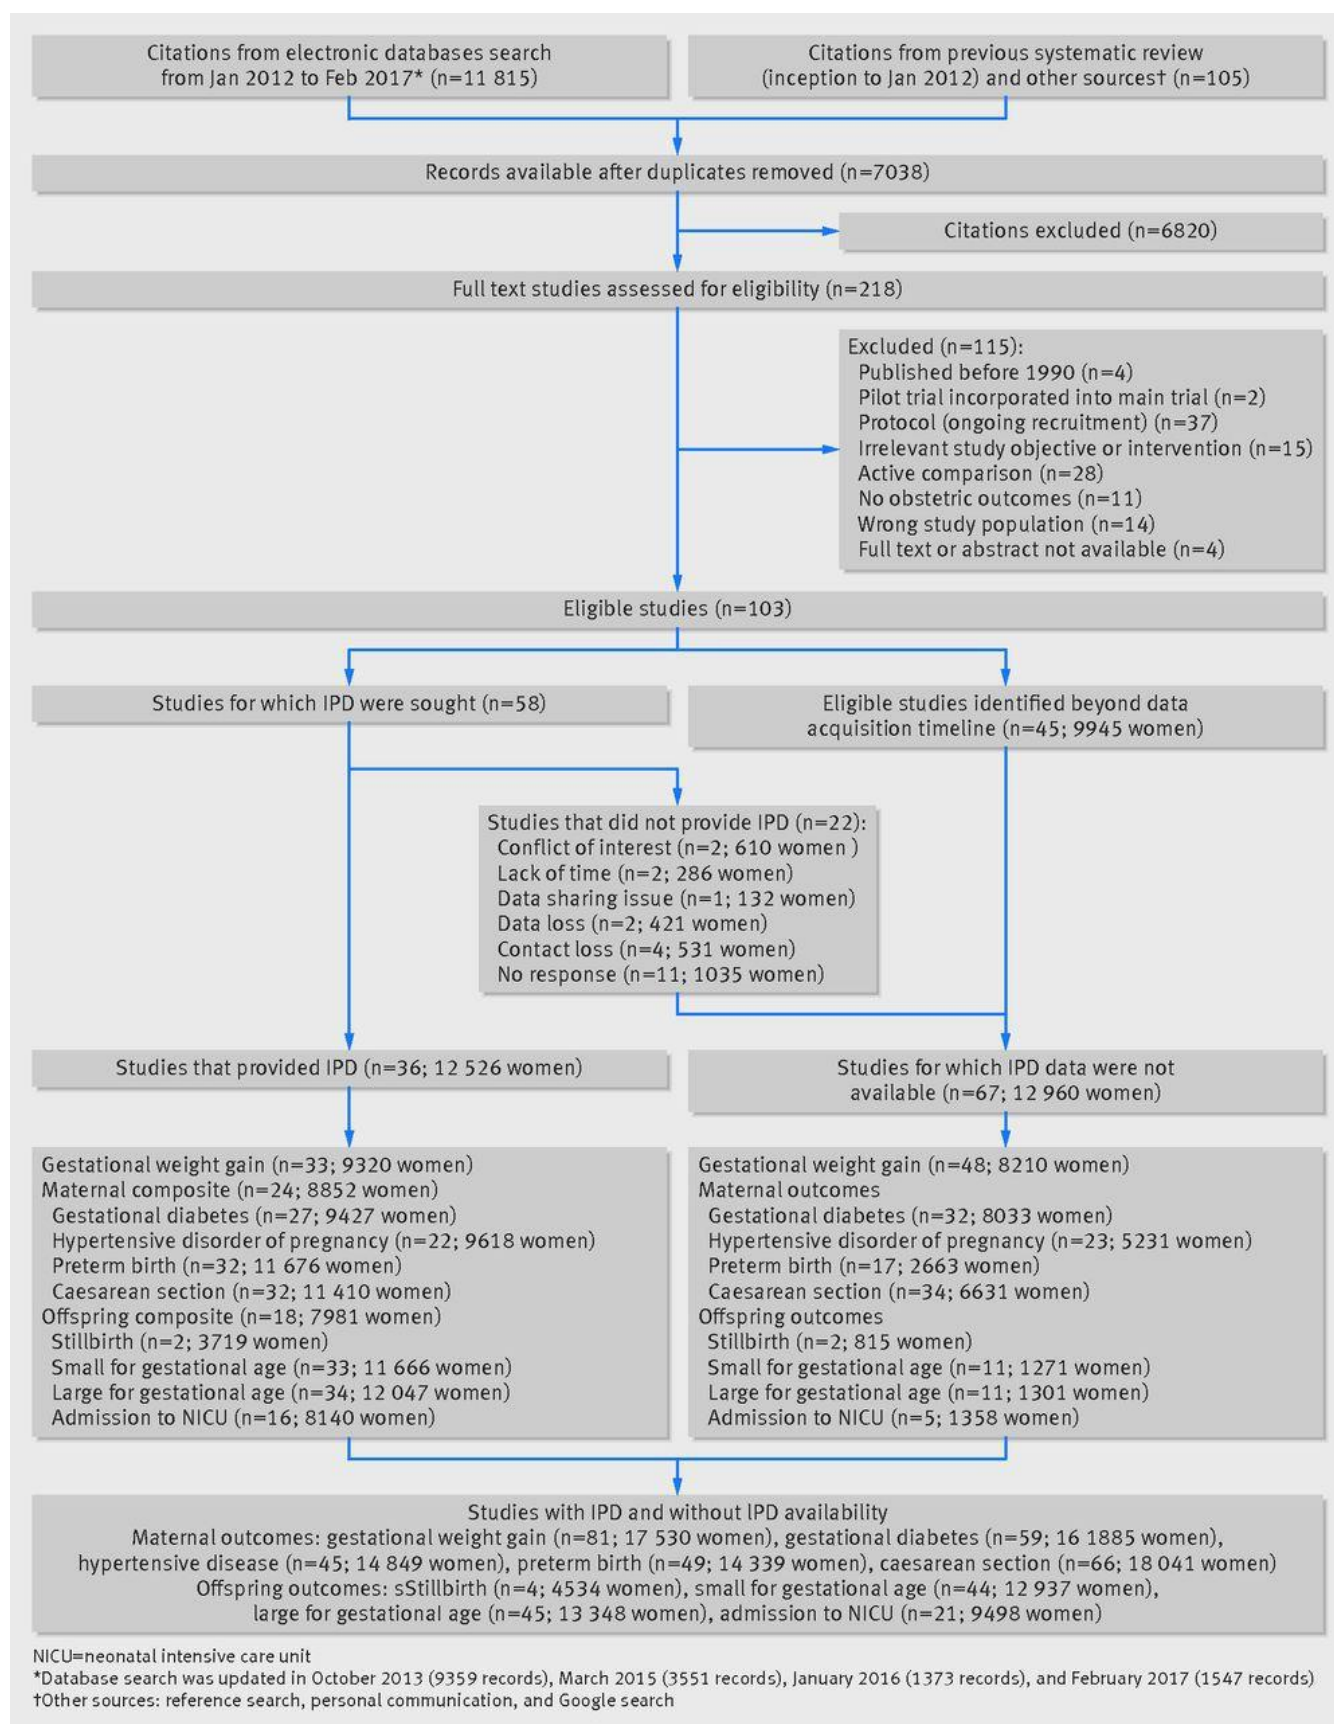

## Appendix 2. Search strategy for identification of randomised trials on lifestyle interventions in pregnancy and maternal and offspring outcomes (original search strategy from BMJ 2017;358:j3119)

### Search strategy for Medline via Ovid

| Item | Term                                                                                                                |
|------|---------------------------------------------------------------------------------------------------------------------|
| 1    | Pregnancy/                                                                                                          |
| 2    | pregnan*.tw.                                                                                                        |
| 3    | Gravidity/                                                                                                          |
| 4    | gravid*.tw.                                                                                                         |
| 5    | gestation*.tw.                                                                                                      |
| 6    | Pregnant Women/                                                                                                     |
| 7    | pregnant wom#n.tw.                                                                                                  |
| 8    | (child adj3 bearing).tw.                                                                                            |
| 9    | childbearing.tw.                                                                                                    |
| 10   | matern*.tw.                                                                                                         |
| 11   | or/1-10                                                                                                             |
| 12   | Weight Gain/ph [Physiology]                                                                                         |
| 13   | weight gain*.tw.                                                                                                    |
| 14   | Weight Loss/ph [Physiology]                                                                                         |
| 15   | weight loss*.tw.                                                                                                    |
| 16   | weight change*.tw.                                                                                                  |
| 17   | Obesity/dh, me, ph, pc, px, th [Diet Therapy, Metabolism, Physiology, Prevention & Control, Psychology, Therapy]    |
| 18   | obes*.tw.                                                                                                           |
| 19   | Adiposity/ph [Physiology]                                                                                           |
| 20   | adipos*.tw.                                                                                                         |
| 21   | Overweight/dh, me, ph, pc, px, th [Diet Therapy, Metabolism, Physiology, Prevention & Control, Psychology, Therapy] |
| 22   | overweight*.tw.                                                                                                     |
| 23   | Body Mass Index/                                                                                                    |
| 24   | bmi.tw.                                                                                                             |
| 25   | or/12-24                                                                                                            |
| 26   | exp Randomized Controlled Trial/                                                                                    |
| 27   | "randomized controlled trial".pt.                                                                                   |
| 28   | "controlled clinical trial".pt.                                                                                     |
| 29   | (random\$ or placebo\$).tw,sh.                                                                                      |
| 30   | ((singl\$ or double\$ or triple\$ or treble\$) and (blind\$ or mask\$)).tw,sh.                                      |
| 31   | single-blind method/                                                                                                |
| 32   | double-blind method/                                                                                                |
| 33   | or/26-32                                                                                                            |
| 34   | 11 and 25 and 33                                                                                                    |
| 35   | exp Animals/                                                                                                        |
| 36   | (rat\$ or mouse or mice or hamster\$ or animal\$ or dog\$ or cat\$ or bovine or sheep or lamb\$).af.                |
| 37   | 35 or 36                                                                                                            |
| 38   | Humans/                                                                                                             |
| 39   | human\$.tw,ot,kf.                                                                                                   |
| 40   | 37 or 38                                                                                                            |
| 41   | 37 not (37 and 40)                                                                                                  |
| 42   | 34 not 41                                                                                                           |

### Appendix 3. Institute of Medicine Guidelines for gestational weight gain per week in trimester 2 and 3, and extrapolated to trimester 1

*Participant level data:* A measured, early-pregnancy weight was available for 4,888 participants. Early-pregnancy weight was estimated using self-reported pre-pregnancy weight for the 295 participants missing this variable. Estimated weight gain per week from pre-pregnancy to early-pregnancy was calculated by the following formula, using only participants with both pre- and early-pregnancy weight, n = 3001:

$$\text{Weight gain from pre- to early-pregnancy} = \frac{\text{Early-pregnancy weight} - \text{pre-pregnancy weight}}{\text{Baseline GA}}$$

Mean weight gain from pre- to early-pregnancy was 0.175 kg/week. We used the following formula to estimate early-pregnancy weight for the 295 participants missing this variable:

$$\text{Early-pregnancy weight} = (\text{Baseline GA} \times 0.175 \text{ kg}) + \text{pre-pregnancy weight}$$

We used pre-pregnancy weight to categorise participants according to BMI. Self-reported pre-pregnancy weight was available for 3,296 participants, and estimated using early-pregnancy weight for the remaining 1,887 participants. We used the following formula to estimate pre-pregnancy weight:

$$\text{Pre-pregnancy weight} = \text{Early-pregnancy weight} - (\text{Baseline GA} \times 0.175 \text{ kg})$$

Total weight gain was calculated by subtracting early-pregnancy weight from final follow-up weight. Weekly GWG was calculated using the following formula:

$$\text{Weight Gain per week} = \frac{\text{Total GWG}}{\text{Final follow-up GA} - \text{Baseline GA}}$$

Trimester 2 and 3 GWG/week was required for comparison with IOM 2009 guidelines. This was calculated using a four-step approach;

1. Trimester 1 GWG/week guidelines were extrapolated from the IOM guidelines(15) .



| BMI Category | Total GWG (IOM Guidelines) |             |        | Rate of weight gain for Trimester 2 and 3 (IOM Guidelines) |       |      |
|--------------|----------------------------|-------------|--------|------------------------------------------------------------|-------|------|
|              | Inadequate                 | Adequate    | Excess | Mean                                                       | Range |      |
| Underweight  | <12.5                      | 12.5 - 18.0 | >18.0  | 0.51                                                       | 0.44  | 0.58 |
| Normal       | <11.5                      | 11.5 - 16.0 | >16.0  | 0.42                                                       | 0.35  | 0.50 |
| Overweight   | <7.0                       | 7.0 - 11.5  | >11.5  | 0.28                                                       | 0.23  | 0.33 |
| Obese        | <5.0                       | 5.0 - 9.0   | >9.0   | 0.22                                                       | 0.17  | 0.27 |

- The number of weeks in trimester 1 that the participant was enrolled in the intervention was calculated by subtracting the baseline GA from 13. If the participant enrolled in the study at greater than 13 weeks, trimester 1 weeks were set as 0. The number of weeks in trimester 2 and 3 that the participant was enrolled in the intervention were calculated by subtracting the 13 from the final follow-up GA.
- The rate of weight gain for Trimester 1 was calculated:

*(Rate of weight gain for Trimester 2 and 3)\*27= Total weight gain for Trimester 2 and 3 (A)*

*Total GWG [ranges for adequate] - Total weight gain for Trimester 2 and 3 [ranges] = Total weight gain for Trimester 1 [ranges] (B)*

*$\frac{\text{Lower range Trimester 1 weight gain} + \text{Upper range Trimester 1 weight gain}}{2} = \text{Mean weight gain for Trimester 1 (C)}$*

*$\frac{\text{Total weight gain for Trimester 1 [mean and ranges]}}{13} = \text{Rate of weight gain for Trimester 1 (D)}$*

| BMI Category | (A) Total weight gain for Trimester 2 and 3 |       |       | Total weight gain for Trimester 1 |           |      | (D) Rate of weight gain for Trimester 1 |       |      |
|--------------|---------------------------------------------|-------|-------|-----------------------------------|-----------|------|-----------------------------------------|-------|------|
|              | Mean                                        | Range |       | (C) Mean                          | (B) Range |      | Mean                                    | Range |      |
| Underweight  | 13.77                                       | 11.88 | 15.66 | 1.48                              | 0.62      | 2.34 | 0.11                                    | 0.05  | 0.18 |
| Normal       | 11.34                                       | 9.45  | 13.50 | 2.28                              | 2.05      | 2.50 | 0.18                                    | 0.16  | 0.19 |
| Overweight   | 7.56                                        | 6.21  | 8.91  | 1.69                              | 0.79      | 2.59 | 0.13                                    | 0.06  | 0.20 |
| Obese        | 5.94                                        | 4.59  | 7.29  | 1.06                              | 0.41      | 1.71 | 0.08                                    | 0.03  | 0.13 |

4. The contribution of trimester 1 weight gain to total GWG was estimated using the mean trimester 1 GWG/week (above) and the following equation:

$$\text{T1 weight gain} = (\text{T1 weight gain per week for BMI}) * (\text{T1 weeks in intervention})$$

5. Trimester 2 and 3 weight gain per week was calculated using the following equation:

$$\text{T2 and T3 weight gain per week} = \frac{\text{Total weight gain} - \text{T1 weight gain}}{\text{Weeks in T2 and T3}}$$
